1 Research Article

2 **Equivalent SARS-CoV-2 viral loads between nasopharyngeal swab and**  
3 **saliva in symptomatic patients**

4 **Running title**

5 SARS-CoV2 in nasopharyngeal and saliva sample

6

7 Isao Yokota, PhD, MPH<sup>1</sup>, Takeshi Hattori, MD<sup>2</sup>, Peter Y Shane, MD<sup>3</sup>, Satoshi Konno, MD<sup>4</sup>,  
8 Atsushi Nagasaka, MD<sup>5</sup>, Kimihiro Takeyabu, MD<sup>6</sup>, Shinichi Fujisawa, BS<sup>7</sup>, Mutsumi Nishida,  
9 PhD<sup>7</sup>, Takanori Teshima, MD<sup>3,7,8</sup>

10

11 <sup>1</sup>Department of Biostatistics, Hokkaido University Faculty of Medicine, Sapporo, Japan.

12 <sup>2</sup>Department of Respiratory Medicine, Hokkaido Medical Center, Sapporo, Japan

13 <sup>3</sup>International Medical Department, Hokkaido University Hospital, Sapporo, Japan.

14 <sup>4</sup>Department of Respiratory Medicine, Hokkaido University Faculty of Medicine, Sapporo,  
15 Japan

16 <sup>5</sup>Department of Infectious Diseases, Sapporo City General Hospital, Sapporo, Japan

17 <sup>6</sup>Department of Respiratory Medicine, Otaru Kyokai Hospital, Otaru, Japan

18 <sup>7</sup>Division of Laboratory and Transfusion Medicine, Hokkaido University Hospital, Sapporo,

NOTE: This preprint reports new research that has not been certified by peer review and should not be used to guide clinical practice.

19 Japan.

20 <sup>8</sup>Department of Hematology, Hokkaido University Faculty of Medicine, Sapporo, Japan

21

22 **Correspondence address**

23 Takanori Teshima, M.D., Ph.D.

24 Department of Hematology, Hokkaido University Faculty of Medicine

25 N15 W7, Kita-ku, Sapporo, Hokkaido 060-8638, Japan

26 Telephone: 81-11-706-7214, FAX: 81-11-706-7823

27 E-mail: [teshima@med.hokudai.ac.jp](mailto:teshima@med.hokudai.ac.jp)

28

29 Abstract: 184 words

30 Main text: 856 words

31

32 **Abstract**

33 COVID-19 is diagnosed by detecting SARS-CoV-2 by nasopharyngeal swab (NPS) using  
34 real-time quantitative reverse transcriptase polymerase chain reaction (qRT-PCR).  
35 Emerging evidences have shown the utility of saliva, although conflicting results have been  
36 reported regarding viral loads between NPS and saliva. We conducted a study to compare  
37 the viral loads in 42 patients with COVID-19. Both NPS and saliva specimens were  
38 simultaneously obtained at a median of 6 days (range, 1-12) after symptom onset. SARS-  
39 CoV-2 was detected in 34 (81%) using NPS (median Ct value [IQR]=27.4 [21.3, 35.6]) and  
40 38 (90%) using saliva (median Ct value [IQR]= 28.9 [23.1, 33.6]). There was no significance  
41 difference between them (Wilcoxon signed rank test:  $P=0.79$ ) and Kendall's  $W$  was 0.82,  
42 showing a high degree of agreement, indicating equivalent viral loads in NPS and saliva.  
43 After symptom onset, the Ct values of both NPS and saliva continued to increase over time,  
44 with no substantial difference. Self-collected saliva has a detection sensitivity comparable  
45 to that of NPS and is a useful diagnostic tool with mitigating uncomfortable process and the  
46 risk of aerosol transmission to healthcare workers.

47

48 **Key words:** SARS-CoV-2, COVID-19, saliva, PCR

49

50 **Introduction**

51 Rapid and accurate diagnosis of coronavirus disease 2019 (COVID-19) is critical for  
52 containing outbreaks that may overwhelm healthcare systems. Although the detection of  
53 SARS-CoV-2 nucleic acids from nasopharyngeal swabs (NPS) is considered a gold  
54 standard in the diagnosis, self-collected saliva has been reported to have several  
55 advantages (1, 2). Specifically, self-collection reduces the risk of viral exposure for the  
56 healthcare worker and causes less discomfort for the patients. However, although emerging  
57 evidences have shown the utility of saliva as an alternative to NPS, (3-7) conflicting results  
58 have been reported regarding SARS-CoV-2 viral loads between NPS and saliva. Wyllie et  
59 al. showed that the viral load was five-times higher in saliva than NPS(8), while others have  
60 reported results to the contrary(9, 10). Herein, we conducted a study to compare the viral  
61 loads in paired samples (saliva and NPS) from symptomatic patients who were admitted for  
62 COVID-19.

63

64 **Methods**

65 Forty-two patients diagnosed with COVID-19 by positive qRT-PCR of NPS were enrolled in  
66 this study. Paired NPS and saliva samples were simultaneously collected from all patients  
67 upon hospital admission between June 12, 2020 and August 6, 2020. This study was

68 approved by the Institutional Ethics Board (Hokkaido University Hospital Division of Clinical  
69 Research Administration Number: 020-0116) and informed consent was obtained from all  
70 patients.

71 qRT-PCR was performed at a central laboratory (SRL, Tokyo, Japan). Self-collected saliva  
72 was diluted 4-fold with phosphate buffered saline and centrifuged at  $2000 \times g$  for 5 min to  
73 remove cells and debris. RNA was extracted from 200  $\mu\text{L}$  of the supernatant or  
74 nasopharyngeal swab samples using QIAasymphony DSP Virus/Pathogen kit and QIAamp  
75 Viral RNA Mini Kit (QIAGEN, Hilden, Germany). qRT-PCR tests were performed, according  
76 to the manual by the National Institute of Infectious Diseases (NIID,  
77 <https://www.niid.go.jp/niid/images/epi/corona/2019-nCoVmanual20200217-en.pdf>). Briefly,  
78 5 $\mu\text{L}$  of the extracted RNA was used to perform one step qRT-PCR using THUNDERBIRD®  
79 Probe One-step qRT-PCR Kit (TOYOBO, Osaka, Japan) and 7500 Real-time PCR Systems  
80 (Thermo Fisher Scientific, Waltham, USA). The cycle threshold (Ct)-values were obtained  
81 by using N1 primers (N\_Sarbeco\_F1, N\_Sarbeco\_R1) with N1 probe (N\_Sarbeco\_P1)  
82 and by using N2 primers (NIID\_2019-nCOV\_N\_F2, NIID\_2019-nCOV\_N\_R2) with N2 probe  
83 (NIID\_2019-nCOV\_N\_P2).

84 Ct values of qRT-PCR using NPS and saliva were expressed as scatter plots with Kendall's  
85 coefficient of concordance  $W$  as nonparametric intraclass correlation coefficient. Scatter

86 plots of Ct values and days from symptom onset for each type of specimen were also  
87 provided to examine the relationship between disease course and viral load. To find the  
88 longitudinal trends, we performed a median spline regression using “qsreg” function with the  
89 default parameters in R. Statistical analysis was conducted by R 4.0.2. All analyzed data  
90 were distributed in Supplement.

91

## 92 **Results**

93 17 female (40%) and 25 male (60%) patients participated in the study. Median age of the  
94 patients was 73 years-old (range, 27 to 93) and specimens were obtained at a median of 6  
95 days (range, 1-12) after symptom onset. SARS-CoV-2 was detected in NPS and saliva in  
96 81% (34/42) and 90% (38/42) of the patients, respectively (Table 1). The Ct values using  
97 the N2 primers/probe were not significantly different between NPS and saliva, with median  
98 [IQR] of 27.4 [21.3, 35.6] and 28.9 [23.1, 33.6], respectively (Wilcoxon’s signed rank  $P=0.79$ ,  
99 Figure 1A). Kendall’s  $W$  was 0.82, showing a high degree of agreement. Additionally, the Ct  
100 values of both NPS and saliva continued to increase over time, with no substantial difference  
101 (Figure 1C). There were cases of both NPS and saliva that became undetermined only three  
102 days after the onset of symptoms. Similar results were obtained from N1 primers/probe; the  
103 Ct values using the N1 primers/probe were equivalent between NPS and saliva, with median

104 [IQR] of 31.0 [24.2, 39.5] and 33.1 [27.3, 37.3], respectively (Wilcoxon's signed rank  $P=0.24$ ,  
105 Figure 1B). Kendall's  $W$  was 0.83, showing a high degree of agreement. Changes in Ct  
106 values of both NPS and saliva were not different over time (Figure 1D).

107

## 108 **Discussion**

109 In this study in symptomatic inpatients with COVID-19, SARS-CoV-2 was detected in saliva  
110 in 90% of the patients compared to 81% in NPS, with equivalent viral loads in the two  
111 specimens. Although there have been conflicting results reported to date(8-10), our study  
112 was designed to have significant advantages over previous studies; the number of patients  
113 was relatively large, paired samples were simultaneously collected, and qRT-PCR was  
114 performed at an independent central laboratory. Our results demonstrate that self-collected  
115 saliva is a useful alternative to NPS for the diagnosis of COVID-19. Furthermore, we recently  
116 reported equivalent sensitivity and specificity of qRT-PCR using saliva and NPS, again with  
117 equivalent viral loads in a large number of asymptomatic individuals in the setting of mass-  
118 screening(11). Taken together, self-collected saliva provides highly accurate results and  
119 should be considered as an easier and cost-efficient alternative for the detection of SARS-  
120 CoV-2 in both symptomatic and asymptomatic individuals.

121 In summary, self-collected saliva is a useful alternative to NPS as a specimen for

122 detecting SARS-CoV-2 nucleic acids. The methodology of self-collection carries significant  
123 logistical and cost advantages over NPS by mitigating the risk of aerosol transmission to  
124 healthcare workers and obviating the need for full protective suits.

125

## 126 **Acknowledgments**

127 The authors declare that they have no competing interests. This study was funded by Health,  
128 Labour and Welfare Policy Research Grants 20HA2002.

129

130

## 131 **References**

- 132 1. Wang W, Xu Y, Gao R, Lu R, Han K, Wu G, Tan W. 2020. Detection of SARS-CoV-2  
133 in Different Types of Clinical Specimens. JAMA doi:10.1001/jama.2020.3786.
- 134 2. Wang X, Tan L, Wang X, Liu W, Lu Y, Cheng L, Sun Z. 2020. Comparison of  
135 nasopharyngeal and oropharyngeal swabs for SARS-CoV-2 detection in 353 patients  
136 received tests with both specimens simultaneously. Int J Infect Dis 94:107-109.
- 137 3. To KK, Tsang OT, Chik-Yan Yip C, Chan KH, Wu TC, Chan JMC, Leung WS, Chik TS,  
138 Choi CY, Kandamby DH, Lung DC, Tam AR, Poon RW, Fung AY, Hung IF, Cheng VC,  
139 Chan JF, Yuen KY. 2020. Consistent detection of 2019 novel coronavirus in saliva.



- 140 Clin Infect Dis doi:10.1093/cid/ciaa149.
- 141 4. Azzi L, Carcano G, Gianfagna F, Grossi P, Gasperina DD, Genoni A, Fasano M,  
142 Sessa F, Tettamanti L, Carinci F, Maurino V, Rossi A, Tagliabue A, Baj A. 2020. Saliva  
143 is a reliable tool to detect SARS-CoV-2. J Infect 81:e45-e50.
- 144 5. Williams E, Bond K, Zhang B, Putland M, Williamson DA. 2020. Saliva as a non-  
145 invasive specimen for detection of SARS-CoV-2. J Clin Microbiol  
146 doi:10.1128/JCM.00776-20.
- 147 6. Tu YP, Jennings R, Hart B, Cangelosi GA, Wood RC, Wehber K, Verma P, Vojta D,  
148 Berke EM. 2020. Swabs Collected by Patients or Health Care Workers for SARS-  
149 CoV-2 Testing. N Engl J Med 383:494-496.
- 150 7. Iwasaki S, Fujisawa S, Nakakubo S, Kamada K, Yamashita Y, Fukumoto T, Sato K,  
151 Oguri S, Taki K, Senjo H, Sugita J, Hayasaka K, Konno S, Nishida M, Teshima T.  
152 2020. Comparison of SARS-CoV-2 detection in nasopharyngeal swab and saliva. J  
153 Infect 81:e145-e147.
- 154 8. Wyllie AL, Fournier J, Casanovas-Massana A, Campbell M, Tokuyama M,  
155 Vijayakumar P, Geng B, Muenker MC, Moore AJ, Vogels CBF, Petrone ME, Ott IM,  
156 Lu P, Lu-Culligan A, Klein J, Venkataraman A, Earnest R, Simonov M, Datta R,  
157 Handoko R, Naushad N, Sewanan LR, Valdez J, White EB, Lapidus S, Kalinich CC,

- 158 Jiang X, Kim DJ, Kudo E, Linehan M, Mao T, Moriyama M, Oh JE, Park A, Silva J,  
159 Song E, Takahashi T, Taura M, Weizman O-E, Wong P, Yang Y, Bermejo S, Odio C,  
160 Omer SB, Dela Cruz CS, Farhadian S, Martinello RA, Iwasaki A, Grubaugh ND, Ko  
161 Al. 2020. Saliva is more sensitive for SARS-CoV-2 detection in COVID-19 patients  
162 than nasopharyngeal swabs. medRxiv doi:10.1101/2020.04.16.20067835.
- 163 9. Williams E, Bond K, Zhang B, Putland M, Williamson DA. 2020. Saliva as a  
164 Noninvasive Specimen for Detection of SARS-CoV-2. J Clin Microbiol 58.
- 165 10. Becker D, Sandoval E, Amin A, al. e. 2020. Saliva is less sensitive than  
166 nasopharyngeal swabs for COVID-19 detection in the community setting. medRxiv  
167 doi:<https://doi.org/10.1101/2020.05.11.20092338>.
- 168 11. Yokota I, Shane PY, Okada K, Unoki Y, Yang Y, Inao T, Sakamaki K, Iwasaki S,  
169 Hayasaka K, Sugita J, Nishida M, Fujisawa S, Teshima T. 2020. Mass screening of  
170 asymptomatic persons for SARS-CoV-2 using saliva. medRxiv  
171 doi:10.1101/2020.08.13.20174078:2020.08.13.20174078.

172

173 **Table 1. Detection summary of SARS-CoV-2 (N=42)**

| nasopharyngeal swab | saliva   |          |
|---------------------|----------|----------|
|                     | positive | negative |
| positive            | 34       | 0        |
| negative            | 4        | 4        |

174

175

176 **Figure 1. Viral loads of SARS-CoV-2 between nasopharyngeal swab and saliva**  
177 **specimens.**

178

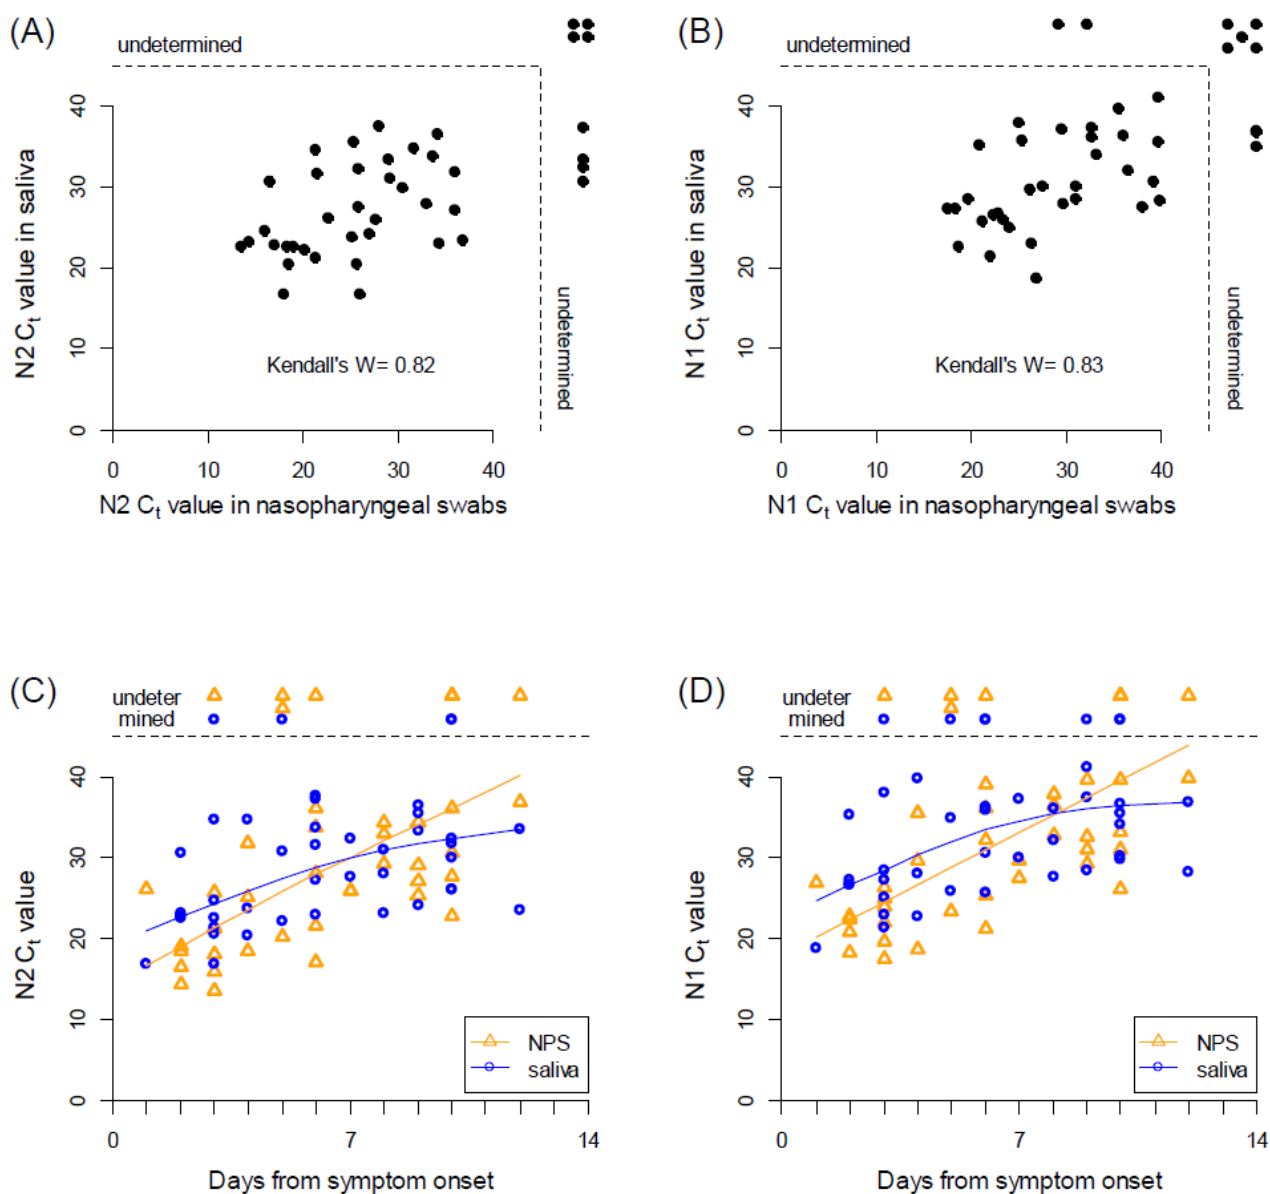

179

180 **(A, B)** Scatter plots of  $C_t$  values using N2 **(A)** or N1 **(B)** primer and probe between NPS and

181 saliva specimens taken from 42 COVID-19 patients. **(C, D)** Scatter plots of  $C_t$  values using

182 N2 **(C)** or N1 **(D)** primer and probe primer against days from symptom onset. Median spline

183 curves are also drawn using “qsreg” function with the default parameters in R.

184
